# Supplementary material
Source: Royal Society of Chemistry journal article supplement (doi:10.1039/d6cp00034g)

### Prediction of Multifunctional Mo<sub>4</sub>SiC Monolayer Material with Intrinsic Superconductivity, Giant Negative Poisson's Ratio, and Promising Hydrogen Evolution Reaction Performance

**Fig.S1.** Electronic band structures of the Mo<sub>4</sub>SiC monolayer calculated using different methods: PBE (black), HSE06 (red), and DFT+U with U = 2, 4, and 6 eV (blue, green, and orange lines, respectively). The Fermi level is set to 0 eV. All methods consistently predict a metallic character for the material, as bands cross the Fermi level.

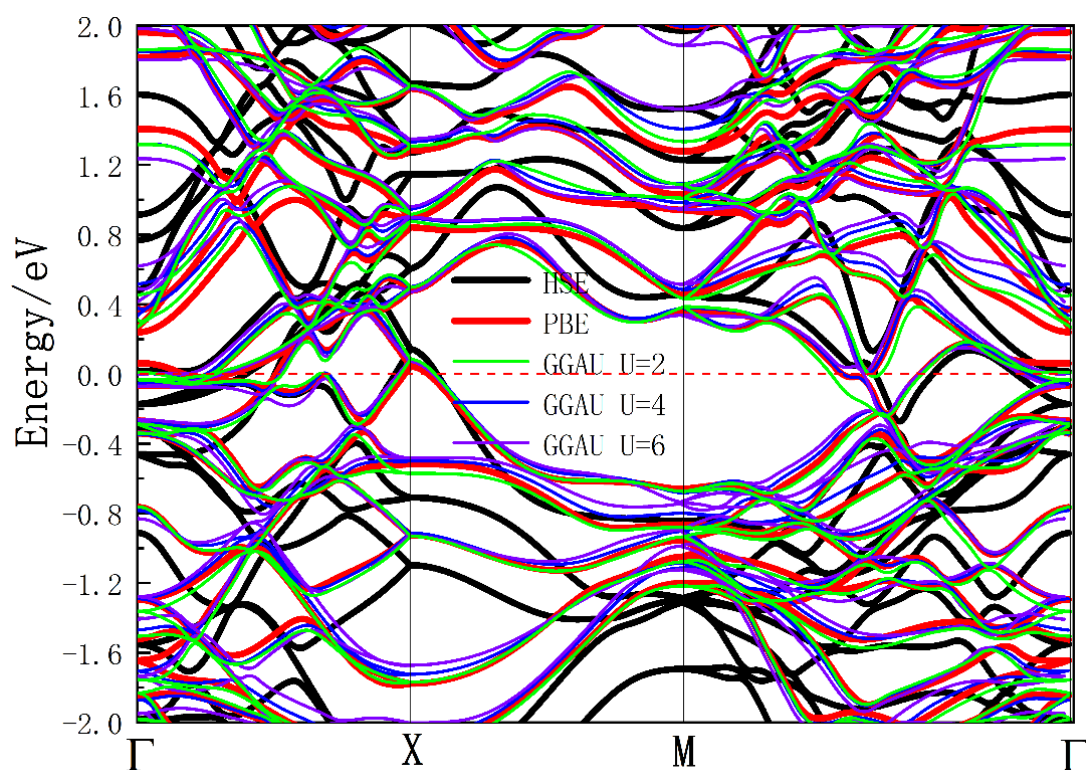

**Fig.S2.** Low-energy structures of Mo<sub>4</sub>SiC identified through the CALYPSO structural search, viewed along different orientations: top view and side views of distinct configurations. The relative energies (in meV/atom) with respect to the ground state are indicated below each structure, highlighting the identified most stable configuration.

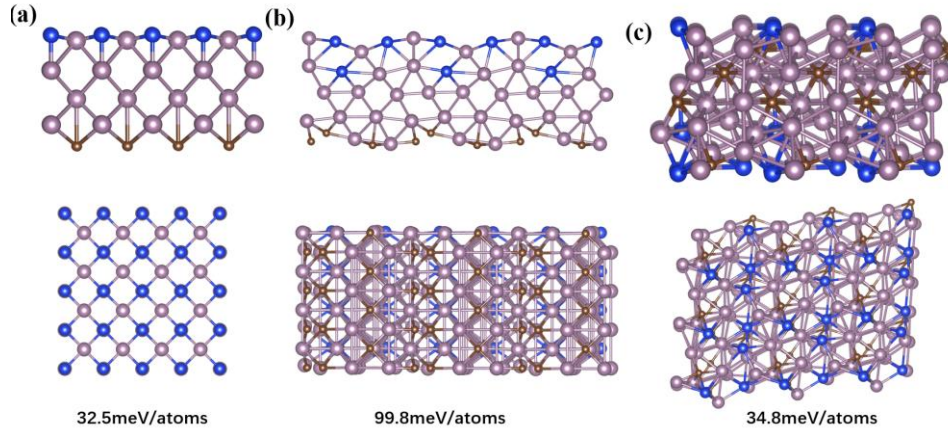

**Fig.S3** Structural stability of the  $\text{Mo}_4\text{SiC}$  monolayer during *ab initio* molecular dynamics (AIMD) simulations with H or  $\text{H}_2\text{O}$  adsorption. (a, b) Representative atomic structure snapshots (top) and the corresponding temperature fluctuations (bottom) from the 300 K AIMD simulations for the cases of (a) H and (b)  $\text{H}_2\text{O}$  adsorption on the  $\text{Mo}_4\text{SiC}$  surface. The atomic configurations (Snapshots) demonstrate that the monolayer framework remains intact without reconstruction or degradation throughout the 2 ps simulation. The temperature profiles confirm the system's dynamical behavior under the NVT ensemble. Color code for atoms: Mo (brown), Si (blue), C (pink), H (white), O (red).

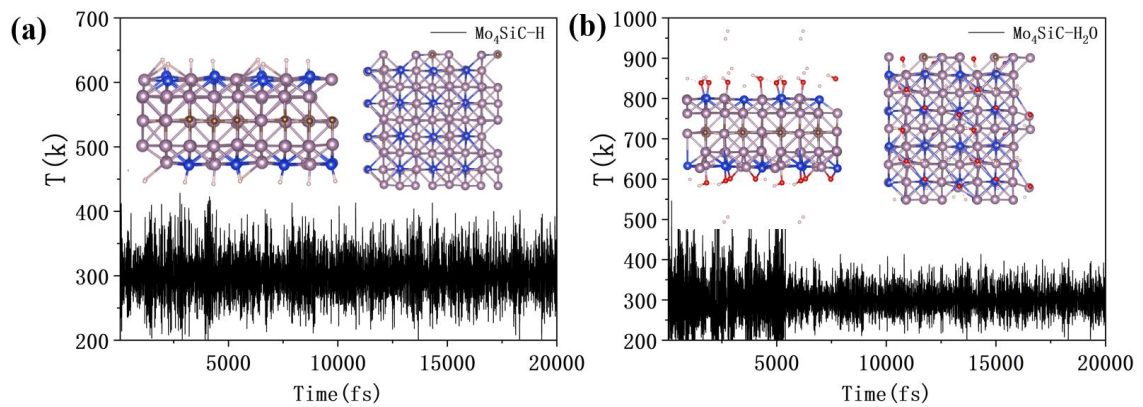

Supplement: d6cp00034g1.pdf [file d6cp00034g1.pdf]
